# Supplementary material for: Mevalonate Kinase Deficiency and Squalene Synthase Inhibitor (TAK-475): The Balance to Extinguish the Inflammation
Source: MDPI journal article supplement (doi:10.3390/biom11101438), 2021-09-30
Supplement: s1 [file s1]

## Supplementary Material

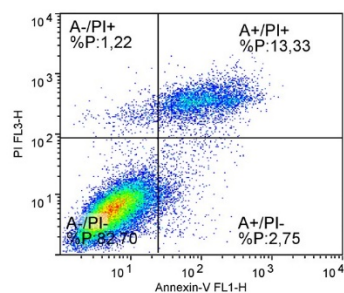

**Supplementary Figure 1.** Exemplificative figure showing FACS analysis of apoptosis, after double staining with Annexin V and Propidium Iodide. The apoptotic cells correspond to the sum of A+/PI+ (late apoptotic) and A+/PI- (early apoptotic) cells.
